# Supplementary material for: Metabolite and transcriptome analysis during fasting suggest a role for the p53-Ddit4 axis in major metabolic tissues
Source: PubMed Central journal article supplement (PMC3907060; doi:10.1186/1471-2164-14-758), 2013-11-05
Supplement: 1471-2164-14-758-S5.pdf [file 1471-2164-14-758-S5.pdf]

## Compare Experiments Workflow 1.0 Data Analysis Report

Server: *portal.genego.com*

Date: *2011-08-23*

Name: *University of Pennsylvania - John Tobias named seat - LPA 1/27/11*

Login: *upenn13*

### Experiments

|    |                                                                                   |                               |
|----|-----------------------------------------------------------------------------------|-------------------------------|
| 1. |  | FAT_fastedvsfed_input_byFDR   |
| 2. |  | SM_fastedvsfed_input_byFDR    |
| 3. |  | liver_fastedvsfed_input_byFDR |

**Figure 1.** The experiments uploaded for comparative analysis

## Table of content:

- [Experiments comparison](#)
- [Enrichment analysis](#)
- [GeneGo Pathway Maps](#)
  - [Top maps \(sorted by common\)](#)
    - [1. Map : Regulation of lipid metabolism\\_Regulation of fatty acid synthase activity in hepatocytes](#)
    - [2. Map : Regulation of lipid metabolism\\_Regulation of lipid metabolism via LXR, NF-Y and SREBP](#)
    - [3. Map : Development\\_Role of IL-8 in angiogenesis](#)
    - [4. Map : Regulation of metabolism\\_Bile acids regulation of glucose and lipid metabolism via FXR](#)
    - [5. Map : Cell cycle\\_Regulation of G1/S transition \(part 1\)](#)

### Experiments comparison

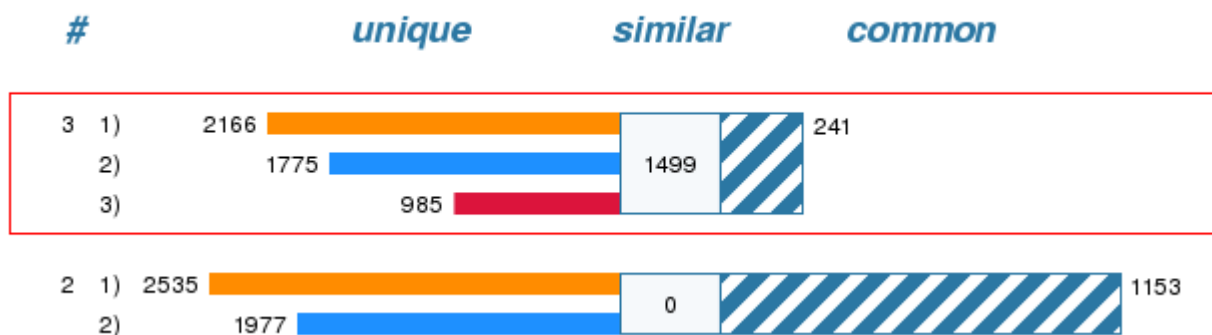

**Figure 2.** The gene content is aligned between all uploaded experiments. The intersection set of experiments is defined as 'common' and marked as a blue/white striped bar. The unique genes for the experiments are marked as colored bars. The genes from the 'similar' set are present in all but one (any) file. The parameters for comparison are set as above.

## ***Enrichment analysis***

Enrichment analysis consists of matching gene IDs of possible targets for the "common", "similar" and "unique" sets with gene IDs in functional ontologies in MetaCore. The probability of a random intersection between a set of IDs the size of target list with ontology entities is estimated in p-value of hypergeometric intersection. The lower p-value means higher relevance of the entity to the dataset, which shows in higher rating for the entity.

Ontologies available for EA in Compare Experiments Workflow:

## GeneGo Pathway Maps

Canonical pathway maps represent a set of about 650 signaling and metabolic maps covering human biology (signaling and metabolism) in a comprehensive way. All maps are drawn from scratch by GeneGo annotators and manually curated & edited. Experimental data is visualized on the maps as blue (for downregulation) and red (upregulation) histograms. The height of the histogram corresponds to the relative expression value for a particular gene/protein.

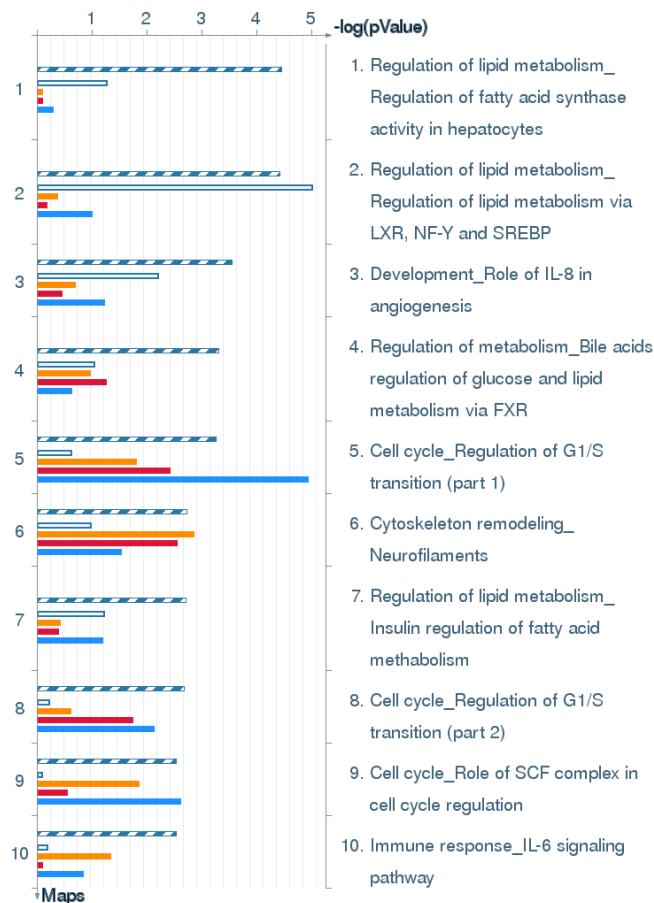

**Figure 3.** GeneGo Pathway Maps. Sorting is done for the 'common' set.

## Top maps (sorted by common)

### 1. Map : [Regulation of lipid metabolism\\_Regulation of fatty acid synthase activity in hepatocytes](#)

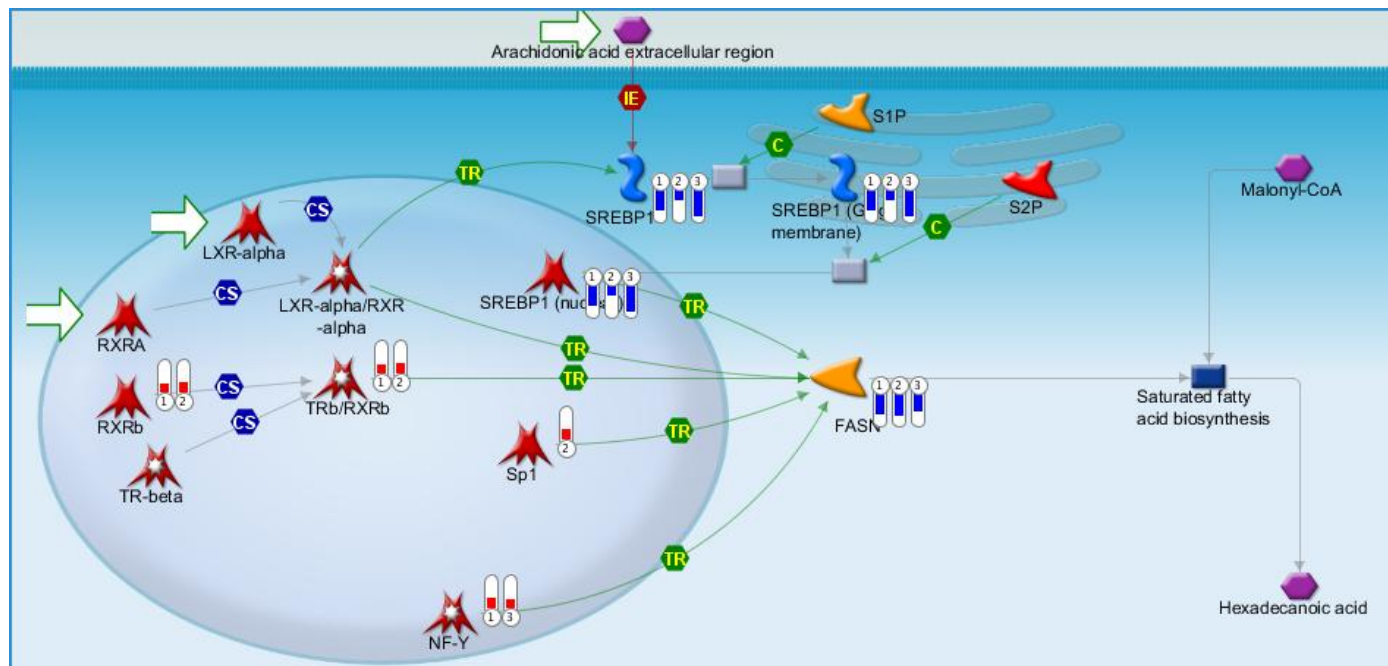

**Figure 4.** The top scored map (map with the the lowest p-value) based on the enrichment distribution sorted by 'common' set. Experimental data from all files is linked to and visualized on the maps as thermometer-like figures. Up-ward thermometers have red color and indicate up-regulated signals and down-ward (blue) ones indicate down-regulated expression levels of the genes.

2. Map : [Regulation of lipid metabolism\\_Regulation of lipid metabolism via LXR, NF-Y and SREBP](#)

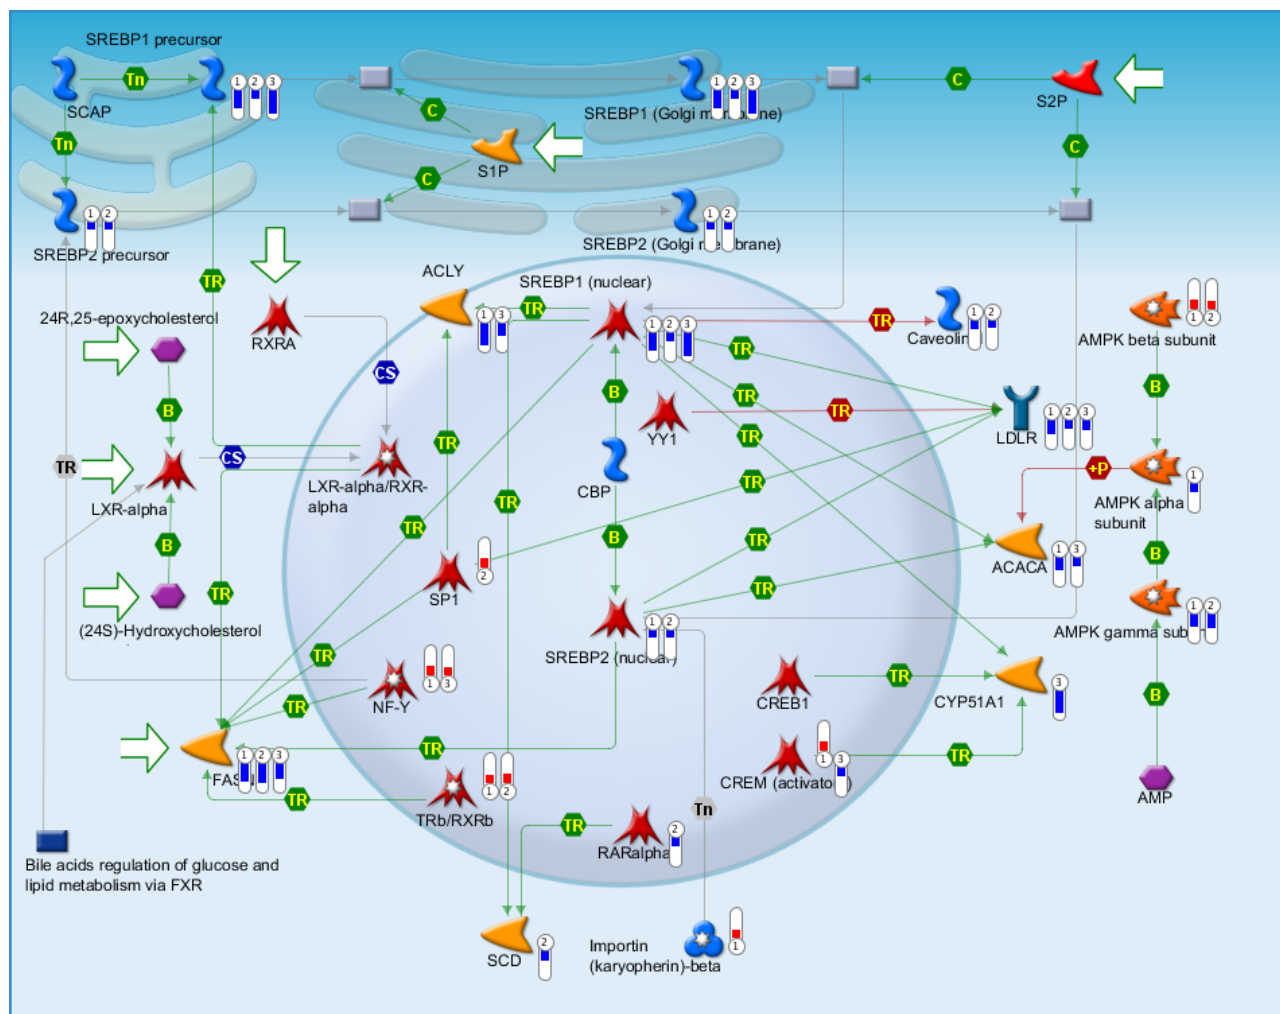

**Figure 5.** The second scored map (map with the second lowest p-value) based on the enrichment distribution sorted by 'common' set. Experimental data from all files is linked to and visualized on the maps as thermometer-like figures. Up-ward thermometers have red color and indicate up-regulated signals and down-ward (blue) ones indicate down-regulated expression levels of the genes.

3. Map : [Development\\_Role of IL-8 in angiogenesis](#)

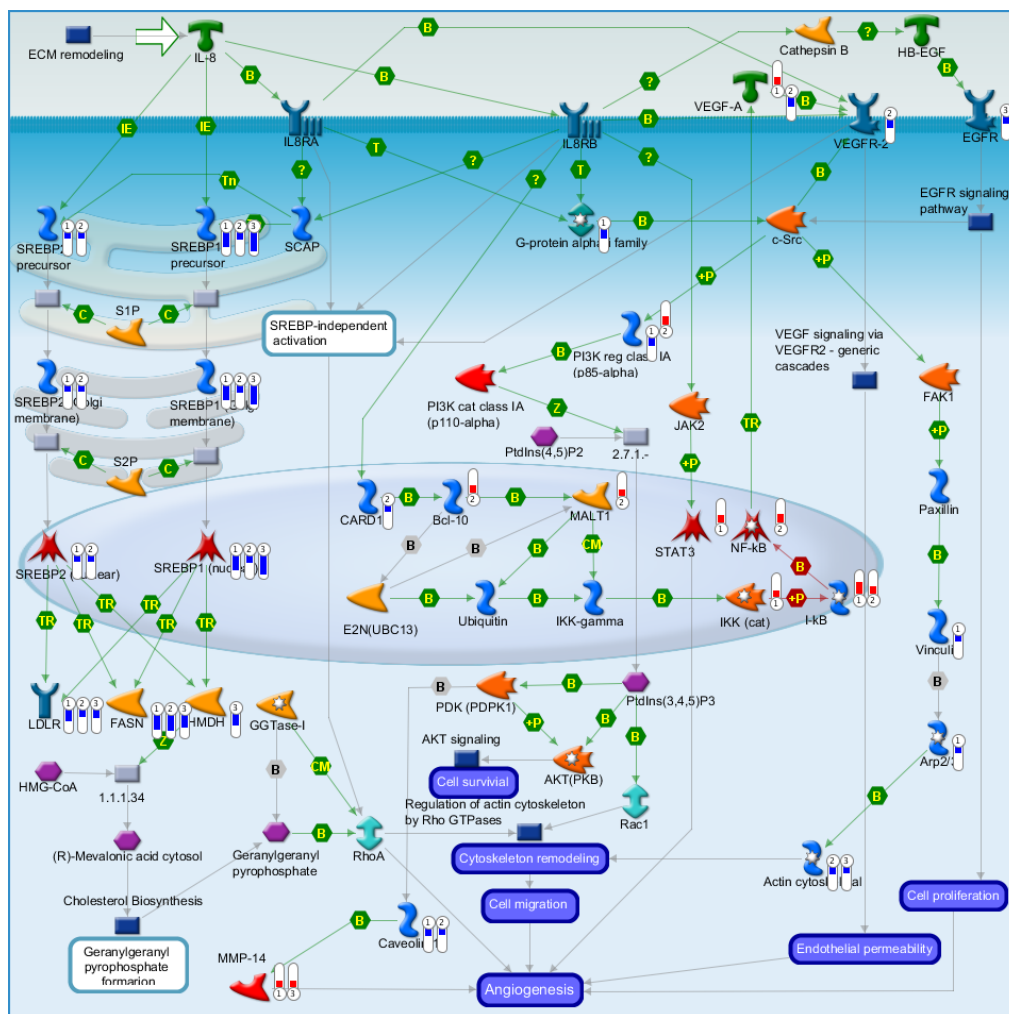

**Figure 6.** The third scored map (map with the third lowest p-value) based on the enrichment distribution sorted by 'common' set. Experimental data from all files is linked to and visualized on the maps as thermometer-like figures. Up-ward thermometers have red color and indicate up-regulated signals and down-ward (blue) ones indicate down-regulated expression levels of the genes.



4. Map : [Regulation of metabolism\\_Bile acids regulation of glucose and lipid metabolism via FXR](#)

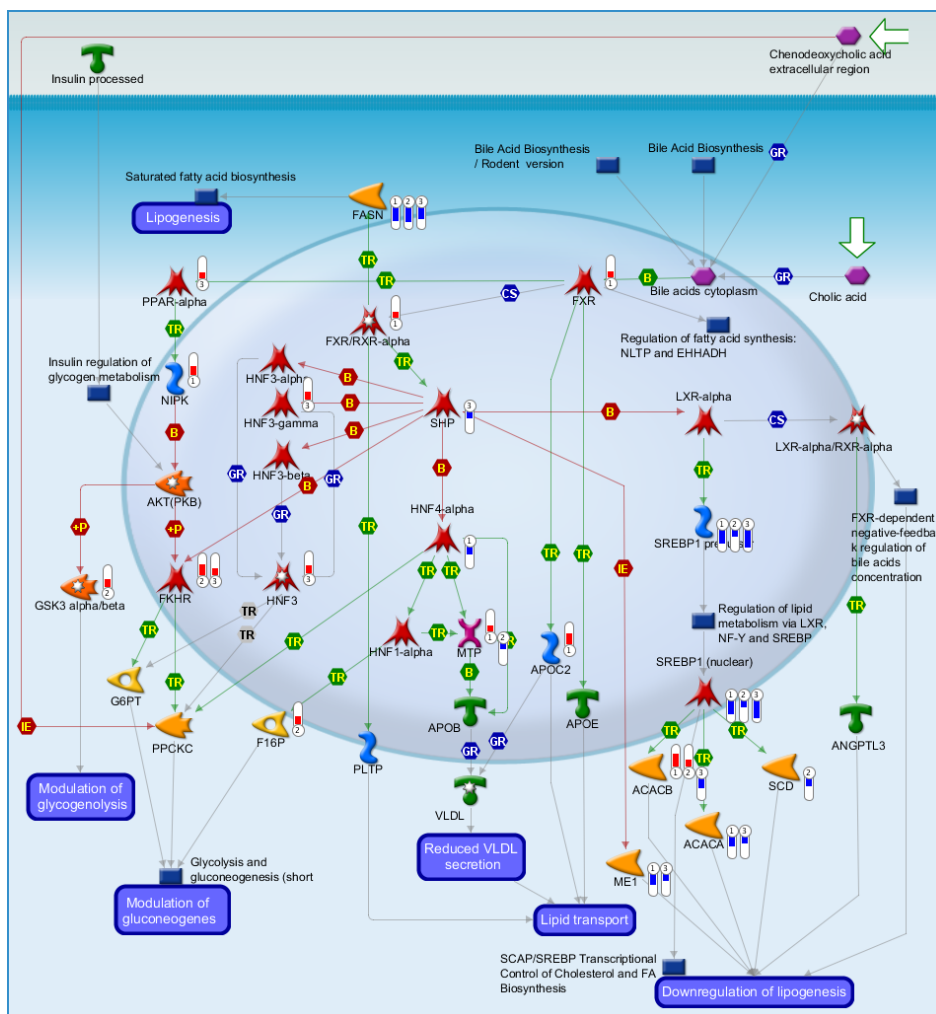

**Figure 7.** The fourth scored map (map with the fourth lowest p-value) based on the enrichment distribution sorted by 'common' set. Experimental data from all files is linked to and visualized on the maps as thermometer-like figures. Up-ward thermometers have red color and indicate up-regulated signals and down-ward (blue) ones indicate down-regulated expression levels of the genes.
